# Supplementary material
Source: HighWire-hosted journal article supplement (https://jnm.snmjournals.org/highwire/filestream/99018/field_highwire_adjunct_files/0/233965_Supplemental_Data.pdf)
Supplement: 233965_Supplemental_Data.pdf [file 233965_Supplemental_Data.pdf]

**SUPPLEMENTAL TABLE 1.** Cell lines evaluated in this study and relevant mutations.

| <b>Cell line</b> | <b>Mutation</b>            |
|------------------|----------------------------|
| IMR-05           | neurofibromatosis type 1   |
| IMR-32           | N/A                        |
| NBL-S            | anaplastic lymphoma kinase |
| NB-EBc1          | tumor protein p53          |
| CHP-134          | N/A                        |
| CHP-212          | anaplastic lymphoma kinase |
| SMS-SAN          | tumor protein p53          |
| NB-69            | tumor protein p53          |
| KELLY            | N/A                        |
| NGP              | N/A                        |
| NB-1691          | N/A                        |
| SK-N-SH          | N/A                        |
| SK-N-BE(2)-C     | N/A                        |
| NLF              | N/A                        |
| SK-N-DZ          | N/A                        |
| SK-N-BE(2)       | N/A                        |
| SK-N-AS          | N/A                        |
| NB-SD            | N/A                        |
| SK-N-FI          | N/A                        |

\*N/A=not applicable

**SUPPLEMENTAL TABLE 2.** EC<sub>50</sub> values of radionuclide therapy in IMR-05 and NLF

|                                       | IMR-05            | NLF              |
|---------------------------------------|-------------------|------------------|
| [ <sup>211</sup> At]MM4               | 620 ± 30 pCi/mL   | 20 ± 4 nCi/mL    |
| [ <sup>125</sup> I]KX1                | 12.5 ± 0.9 nCi/mL | 980 ± 60 nCi/mL  |
| [ <sup>211</sup> At]NaAt <sup>x</sup> | 22.6 ± 1.4 nCi/mL | 2.1 ± 0.2 μCi/mL |
| [ <sup>131</sup> I]KX1                | 82.8 ± 0.8 nCi/mL | 3.8 ± 0.1 μCi/mL |
| [ <sup>125</sup> I]MIBG               | 2.2 ± 0.2 μCi/mL  | 8.2 ± 0.5 μCi/mL |

\*Values are reported as mean ± SEM.

**SUPPLEMENTAL TABLE 3: Parameters of IMR-05 and NLF in the linear-quadratic model**

|                                       | IMR-05      |             | NLF         |         |
|---------------------------------------|-------------|-------------|-------------|---------|
|                                       | $\alpha$    | $\beta$     | $\alpha$    | $\beta$ |
| [ <sup>125</sup> I]KX1                | 3.8 ± 0.2   | N/A         | 0.42 ± 0.03 | N/A     |
| [ <sup>131</sup> I]KX1                | 2.00 ± 0.03 | N/A         | 0.25 ± 0.01 | N/A     |
| [ <sup>125</sup> I]MIBG               | 0.65 ± 0.09 | N/A         | 0.23 ± 0.02 | N/A     |
| [ <sup>211</sup> At]MM4               | 13.6 ± 0.6  | N/A         | 1.3 ± 0.2   | N/A     |
| [ <sup>211</sup> At]NaAt <sup>x</sup> | 3.7 ± 0.2   | N/A         | 0.86 ± 0.08 | N/A     |
| External gamma                        | 0.81 ± 0.06 | 0.22 ± 0.06 | 0.25 ± 0.01 | N/A     |

\*Values are reported as mean ± SEM. N/A=not applicable (approximately zero)

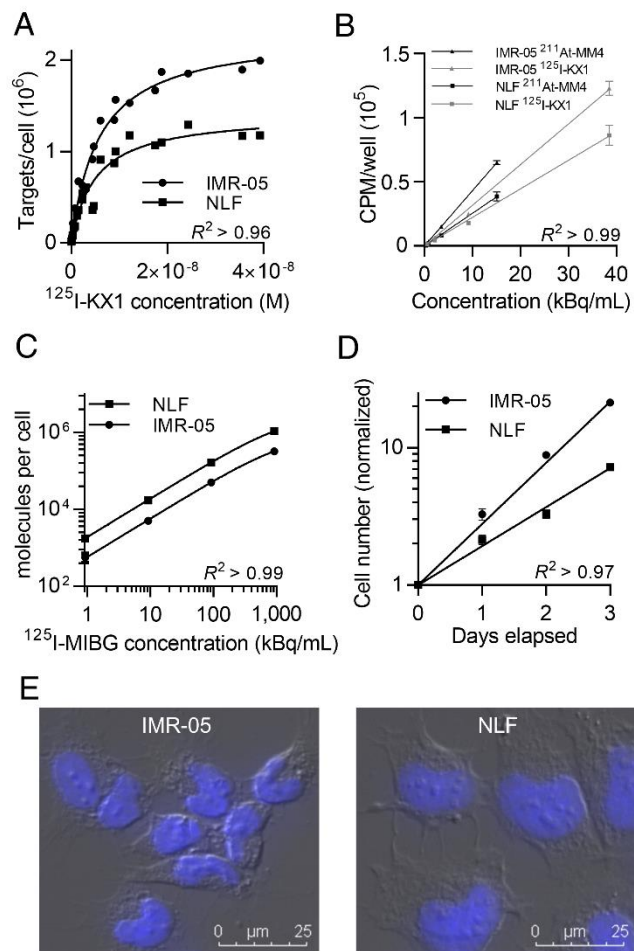

**SUPPLEMENTAL FIGURE 1. (A)** Radioligand saturation binding study with [ $^{125}\text{I}$ ]KX1 revealed higher  $B_{\text{max}}$  in IMR-05 ( $2.30 \pm 0.07 \times 10^6$  targets/cell) than NLF ( $1.41 \pm 0.07 \times 10^6$  targets/cell) but similar  $K_d$  ( $5.8 \pm 0.5$  nM in IMR-05;  $5.1 \pm 0.8$  nM in NLF). **(B)** Comparison of target binding affinity between [ $^{125}\text{I}$ ]KX1 and [ $^{211}\text{At}$ ]MM4 under non-saturating conditions yielded similar  $K_d$  of [ $^{211}\text{At}$ ]MM4 in IMR-05 ( $4.3 \pm 0.5$  nM) and NLF ( $4.5 \pm 0.9$  nM). **(C)** Direct measurement of cellular [ $^{125}\text{I}$ ]MIBG uptake at cytotoxic concentrations showed  $3.29 \pm 0.07$  times greater uptake in NLF compared to IMR-05. **(D)** IMR-05 and NLF cell lines demonstrated exponential growth pattern with doubling times of  $16.2 \pm 0.1$  hours and  $25.5 \pm 0.5$  hours, respectively. **(E)** Bright field and fluorescence microscopy with DAPI staining allowed measurements of nuclear and cellular radii in IMR-05 (6  $\mu\text{m}$  and 8  $\mu\text{m}$ ) and NLF (9  $\mu\text{m}$  and 12  $\mu\text{m}$ ) cells.

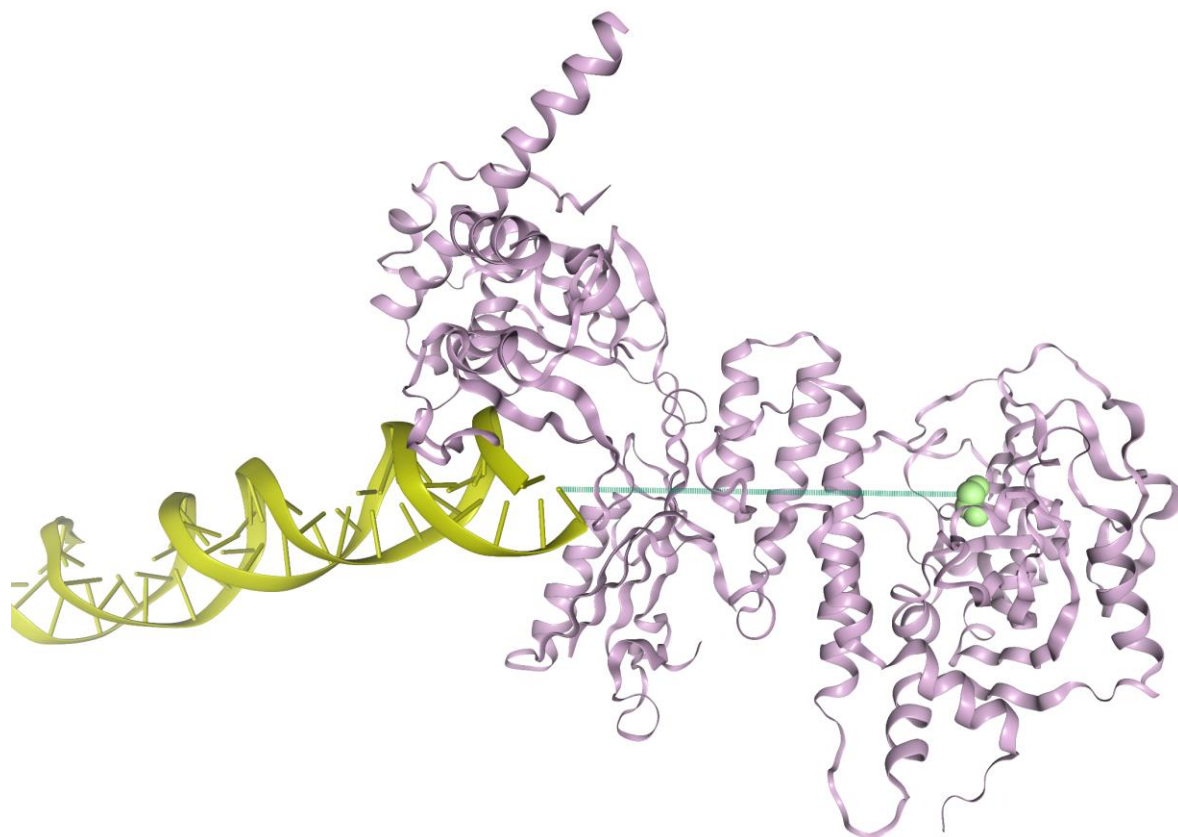

**SUPPLEMENTAL FIGURE 2.** Three-dimensional structure of PARP1 (purple) bound to DNA (yellow). The distance from the PARP1 active site (green) to DNA was measured at 50.0 Å (dotted line) (16-18).

**SUPPLEMENTAL EQUATION 1.** Calculation of the binding affinity ( $K_d$ ) of [ $^{211}\text{At}$ ]MM4 under non-saturating conditions

When  $[\text{Ligand}] \ll K_d$  (less than 1%),

$$(\text{Specific binding}) = \frac{B_{\max}[\text{Ligand}]}{K_d + [\text{Ligand}]} \approx \frac{B_{\max}[\text{Ligand}]}{K_d}$$

Then, solving for  $B_{\max}$  yields

$$B_{\max} = \frac{(\text{Specific binding})(K_d)}{[\text{Ligand}]} = \alpha \cdot K_d$$

where  $\alpha$  is the slope of the specific binding vs.  $[\text{Ligand}]$  plot.

Since  $B_{\max}$  is shared between [ $^{125}\text{I}$ ]KX1 and [ $^{211}\text{At}$ ]MM4,

$$\alpha_{(MM4)} \cdot K_{d(MM4)} = \alpha_{(KX1)} \cdot K_{d(KX1)}$$

Therefore, solving for  $K_{d(MM4)}$  yields

$$K_{d(MM4)} = \frac{\alpha_{(KX1)} \cdot K_{d(KX1)}}{\alpha_{(MM4)}}$$

## SUPPLEMENTAL EQUATION 2. Calculation of cumulated activity

Let

$B$  = number of bound molecules per cell at equilibrium

$A_s$  = specific activity (Bq/moles)

$N_A$  = Avogadro's number

$t_{1/2}$  = physical half-life

$T$  = duration of treatment

$t$  = time

Then, the activity of bound molecules in the cell can be represented as a function of time:

$$A(t) = \frac{B}{N_A} \cdot A_s \cdot e^{-\lambda t}$$

where  $\lambda = \ln(2)/t_{1/2}$ .

Then, the cumulated activity  $\tilde{A}$  can be obtained by integrating  $A(t)$  over the duration of treatment:

$$\tilde{A} = \int_0^T A(t) dt = \int_0^T \frac{B}{N_A} \cdot A_s \cdot e^{-\lambda t} dt = \frac{B}{N_A} \cdot A_s \cdot \left( \frac{1 - e^{-\lambda T}}{\lambda} \right)$$
